# Supplementary material for: More Pronounced Effects of Discectomy over Laminectomy on Postoperative Biomechanics and Clinical Outcomes in UBE for Lumbar Disc Herniation
Source: Research Square preprint supplement (doi:10.21203/rs.3.rs-7918175/v1), 2025-12-30
Supplement: Supplementary file 1 [file e17abefde71f9300635d9390.docx]

| **Table S1 Constitutive models and material coefficients assigned to each lumbar spine structure[8]** | | | |
| --- | --- | --- | --- |
| **Structure** | **Constitutive Model** | **Material Coefficients** | **Poisson’s Ratio** |
| Cortical bone | Isotropic elastic | E = 12000 | 0.3 |
| Trabecular bone | Neo-Hookean | E = 100 | 0.2 |
| Cartilage | Neo-Hookean | E = 10 | 0.4 |
| Nucleus pulposus | Neo-Hookean | E = 1 | 0.49 |
| Annulus fibrosus | Neo-Hookean | E = 4.2 | 0.45 |
| Vertebral endplate | Neo-Hookean | E = 24 | 0.25 |
| ALL | Neo-Hookean | E = 7.8 | 0.3 |
| PLL | Neo-Hookean | E = 10 | 0.3 |
| JCL | Neo-Hookean | E = 7.5 | 0.3 |
| LF | Neo-Hookean | E = 17 | 0.3 |
| ITL | Neo-Hookean | E = 10 | 0.3 |
| SSL | Neo-Hookean | E = 8 | 0.3 |
| ISL | Neo-Hookean | E = 10 | 0.3 |
| ALL: Anterior longitudinal ligament; PLL: posterior longitudinal ligament; JCL: joint capsule ligament;LF: ligamentum favum; ITL: intertransverse ligament; SSL: supraspinous ligament; and ISL: interspinous ligament. | | | |

| **Table S2 Comparison of general information of the UBE with CD and AD groups** | | | |
| --- | --- | --- | --- |
|  | **CD group** | **AD group** | ***P-value*** |
| Numbers of patients | 104 | 28 |  |
| Age (years) | 49.90 ± 12.08 | 45.50 ± 11.76 | 0.202 |
| Sex |  | | 0.541 |
| Male | 62 | 20 |  |
| Female | 42 | 8 |
| Operation time（min） | 88.46 ± 12.33 | 90.36 ± 14.87 | 0.599 |
| Intraoperative Hemorrhage (ml ) | 44.04 ± 9.76 | 47.14 ± 7.77 | 0.256 |
| Hospital stay (days) | 5.14 ± 0.81 | 5.36 ± 0.50 | 0.321 |
| return-to-work time (weeks) | 4.09 ± 1.13 | 8.00 ± 5.10 | 0.013 |
| Resection area of the LC |  | | |
| LC1/3＜LC＜LC1/2 | 76 | 12 |  |
| LC1/2≤LC≤LC2/3 | 24 | 16 |  |
| LC＞LC2/3 | 4 | 0 |  |
| CD, conservative discectomy; AD, aggressive discectomy; LC1/3, one third laminectomy; LC1/2, half laminectomy; LC2/3, two thirds laminectomy; *P-value* < 0.05 was considered statistically significant. | | | |

| **Table S3 Comparison of preoperative and postoperative clinical outcomes of UBE with discectomy** | | | | | | | | | |
| --- | --- | --- | --- | --- | --- | --- | --- | --- | --- |
| **Clinical Outcomes** | **Preoperative** | **3 days**  **postoperative** | **1 month**  **postoperative** | **3 months**  **postoperative** | **6 months**  **postoperative** | ***P-value***  **(X1 VS X2)** | ***P-value***  **(X2 VS X3)** | ***P-value***  **(X3 VS X4)** | ***P-value***  **(X4 VS X5)** |
| VAS of back pain | 4.12±1.31 | 2.50±1.11 | 1.70±1.39 | 1.23±1.26 | 1.02±0.98 | ＜0.001 | ＜0.001 | 0.001 | 0.123 |
| VAS of leg pain | 6.36±1.33 | 1.89±0.81 | 1.30±0.76 | 0.96±0.69 | 0.82±0.70 | ＜0.001 | ＜0.001 | 0.002 | 0.201 |
| ODI | 52.91±12.10 |  | 20.88±6.26 | 15.77±5.81 | 13.15±3.50 |  |  | ＜0.001 | ＜0.001 |
| VAS, Visual Analogue Score; ODI, Oswestry Disability Index; X1, Preoperative; X2, 3 days postoperative; X3, 1 month postoperative; X4, 3 months postoperative; X5, 6 months postoperative. *P-value* < 0.05 was considered statistically significant. | | | | | | | | | |

| **Table S4 Comparison of preoperative and postoperative clinical outcomes between CD group and AD group** | | | | | | |
| --- | --- | --- | --- | --- | --- | --- |
| **Clinical Outcomes** | **CD+ (LC1/3∽LC1/2)** | **AD+( LC1/3∽LC1/2)** | ***P-value*** | **CD+( LC1/2∽LC2/3)** | **AD+( LC1/2∽LC2/3)** | ***P-value*** |
| Nubmers of patients | 76 | 12 | 24 | 16 |
| **VAS of back pain** |  | | | | | |
| Preoperative | 3.74 ± 0.86 | 4.33 ± 0.52 | 0.108 | 4.67 ± 1.78 | 4.63 ± 1.41 | 0.954 |
| 3 days postoperative | 2.05 ± 0.73 | 3.00 ± 1.27 | 0.011 | 3.33 ± 1.30 | 3.13 ± 1.25 | 0.724 |
| 1 month postoperative | 1.05 ± 0.73 | 3.33 ± 1.51 | 0.017 | 2.17 ± 1.47 | 3.00 ± 1.77 | 0.290 |
| 3months postoperative | 0.79 ± 0.88 | 2.17 ± 0.98 | 0.001 | 1.33 ± 1.23 | 2.75 ± 1.67 | 0.042 |
| 6months postoperative | 0.68 ± 0.70 | 1.17 ± 0.75 | 0.188 | 1.17 ± 1.03 | 2.13 ± 1.46 | 0.101 |
| **VAS of leg pain** |  | | | | | |
| Preoperative | 6.37 ± 1.24 | 7.50 ± 0.55 | 0.034 | 6.00 ± 1.41 | 6.50 ± 1.41 | 0.450 |
| 3 days postoperative | 1.87 ± 0.84 | 2.50 ± 0.55 | 0.039 | 1.50 ± 0.67 | 2.13 ± 0.64 | 0.053 |
| 1 month postoperative | 1.26 ± 0.80 | 1.50 ± 0.55 | 0.383 | 1.00 ± 0.60 | 1.63 ± 0.92 | 0.117 |
| 3months postoperative | 1.03 ± 0.64 | 1.17 ± 1.17 | 0.660 | 0.75 ± 0.75 | 0.88 ± 0.35 | 0.669 |
| 6months postoperative | 0.68 ± 0.62 | 0.83 ± 0.75 | 0.661 | 1.08 ± 0.67 | 0.88 ± 0.99 | 0.580 |
| **ODI** |  | | | | | |
| Preoperative | 53.31 ± 11.69 | 63.33 ± 10.56 | 0.070 | 63.33 ± 10.56 | 54.21 ± 15.41 | 0.228 |
| 3 days postoperative |  |  |  |  |  |  |
| 1 month postoperative | 18.19 ± 4.47 | 26.33 ± 5.13 | 0.010 | 22.37 ± 7.11 | 26.75 ± 7.09 | 0.196 |
| 3months postoperative | 13.98 ± 3.99 | 21.22 ± 6.50 | ＜0.001 | 15.38 ± 5.48 | 21.66 ± 7.88 | 0.049 |
| 6months postoperative | 11.99 ± 2.62 | 13.93 ± 2.47 | 0.119 | 13.93 ± 2.47 | 17.10 ± 5.05 | 0.143 |
| CD, conservative discectomy; AD, aggressive discectomy; LC1/3, one third laminectomy; LC1/2, half laminectomy; LC2/3, two thirds laminectomy; *P-value* < 0.05 was considered statistically significant. | | | | | | |

| **Table S5 Comparison of preoperative and postoperative clinical outcomes between the two methods for the resection area of the LC** | | | | | | |
| --- | --- | --- | --- | --- | --- | --- |
| **Clinical Outcomes** | **CD+ (LC1/3∽LC1/2)** | **CD+( LC1/2∽LC2/3)** | ***P-value*** | **AD+( LC1/3∽LC1/2)** | **AD+( LC1/2∽LC2/3)** | ***P-value*** |
| Nubmers of patients | 76 | 24 | 12 | 16 |
| **VAS of back pain** |  | | | | | |
| Preoperative | 3.74±0.86 | 4.67±1.78 | 0.104 | 4.33 ± 0.52 | 4.63±1.41 | 0.640 |
| 3 days postoperative | 2.05±0.73 | 3.33±1.30 | ＜0.001 | 3.00±1.27 | 3.13±1.25 | 0.857 |
| 1 month postoperative | 1.05±0.73 | 2.17±1.47 | 0.001 | 3.33±1.51 | 3.00±1.77 | 0.711 |
| 3 months postoperative | 0.79±0.88 | 1.33±1.23 | 0.176 | 2.17±0.98 | 2.75±1.67 | 0.430 |
| 6 months postoperative | 0.68±0.70 | 1.17±1.03 | 0.151 | 1.17±0.75 | 2.13±1.46 | 0.134 |
| **VAS of leg pain** |  | | | | | |
| Preoperative | 6.37±1.24 | 6.00±1.41 | 0.430 | 7.50±0.55 | 6.50±1.41 | 0.129 |
| 3 days postoperative | 1.87±0.84 | 1.50±0.67 | 0.135 | 2.50±0.55 | 2.13±0.64 | 0.262 |
| 1 month postoperative | 1.26±0.80 | 1.00±0.60 | 0.298 | 1.50±0.55 | 1.63±0.92 | 0.756 |
| 3 months postoperative | 1.03±0.64 | 0.75±0.75 | 0.268 | 1.17±1.17 | 0.88±0.35 | 0.513 |
| 6 months postoperative | 0.68±0.62 | 1.08±0.67 | 0.084 | 0.83±0.75 | 0.88±0.99 | 0.930 |
| **ODI** |  | | | | | |
| Preoperative | 53.31±11.69 | 47.62±8.24 | 0.072 | 63.33±10.56 | 54.21±15.41 | 0.214 |
| 3 days postoperative |  |  |  |  |  |  |
| 1 month postoperative | 18.19±4.47 | 22.37±7.11 | 0.019 | 26.33±5.13 | 26.75±7.09 | 0.901 |
| 3 months postoperative | 13.98±3.99 | 15.38±5.48 | 0.428 | 21.22±6.50 | 21.66±7.88 | 0.910 |
| 6 months postoperative | 11.99±2.62 | 13.88±3.47 | 0.103 | 13.93±2.47 | 17.10±5.05 | 0.152 |
| CD, conservative discectomy; AD, aggressive discectomy; LC1/3, one third laminectomy; LC1/2, half laminectomy; LC2/3, two thirds laminectomy; *P-value* < 0.05 was considered statistically significant. | | | | | | |

| **Table S6 Maximum von-Mises stresses values for intervertebral disc of two methods of nucleus pulposus removel in the six models (MPa)** | | | | | | | | | |
| --- | --- | --- | --- | --- | --- | --- | --- | --- | --- |
|  | **CD+LC1/3** | **AD+LC1/3** | **X1** | **CD+LC1/2** | **AD+LC1/2** | **X2** | **CD+LC2/3** | **AD+LC2/3** | **X3** |
| Flexion | 3.6294 | 4.8542 | -1.2248 | 3.6279 | 4.851 | -1.2231 | 3.6205 | 4.8415 | -1.221 |
| Extension | 3.6085 | 4.9037 | -1.2952 | 3.6027 | 4.8942 | -1.2915 | 3.5791 | 4.8468 | -1.2677 |
| Left bending | 8.3288 | 11.871 | -3.5422 | 8.3262 | 11.869 | -3.5428 | 8.3216 | 11.873 | -3.5514 |
| Right bending | 5.0597 | 5.7574 | -0.6977 | 5.0633 | 5.7624 | -0.6991 | 5.0751 | 5.7781 | -0.703 |
| Left rotation | 5.67 | 8.1879 | -2.5179 | 5.673 | 8.1948 | -2.5218 | 5.6781 | 8.2066 | -2.5285 |
| Right rotation | 3.7356 | 5.2506 | -1.515 | 3.7192 | 5.2296 | -1.5104 | 3.6812 | 5.1977 | -1.5165 |
| CD, conservative discectomy; AD, aggressive discectomy; LC1/3, one third laminectomy; LC1/2, half laminectomy; LC2/3, two thirds laminectomy; X1, ( CD+LC1/3) minus ( AD+LC1/3); X2, ( CD+LC1/2) minus ( AD+LC1/2); X3, ( CD+LC2/3) minus ( AD+LC2/3). | | | | | | | | | |

| **Table S7 Maximum von-Mises stresses values for intervertebral disc of the two methods for the resection area of the LC in the six models (MPa)** | | | | | | | | | | |
| --- | --- | --- | --- | --- | --- | --- | --- | --- | --- | --- |
|  | **CD+LC1/3** | **CD+LC1/2** | **CD+LC2/3** | **X1** | **X2** | **AD+LC1/3** | **AD+LC1/2** | **AD+LC2/3** | **X3** | **X4** |
| Flexion | 3.6294 | 3.6279 | 3.6205 | 0.0015 | 0.0074 | 4.8542 | 4.851 | 4.8415 | 0.0032 | 0.0095 |
| Extension | 3.6085 | 3.6027 | 3.5791 | 0.0058 | 0.0236 | 4.9037 | 4.8942 | 4.8468 | 0.0095 | 0.0474 |
| Left bending | 8.3288 | 8.3262 | 8.3216 | 0.0026 | 0.0046 | 11.871 | 11.869 | 11.873 | 0.002 | -0.004 |
| Right bending | 5.0597 | 5.0633 | 5.0751 | -0.0036 | -0.0118 | 5.7574 | 5.7624 | 5.7781 | -0.005 | -0.0157 |
| Left rotation | 5.67 | 5.673 | 5.6781 | -0.003 | -0.0051 | 8.1879 | 8.1948 | 8.2066 | -0.0069 | -0.0118 |
| Right rotation | 3.7356 | 3.7192 | 3.6812 | 0.0164 | 0.038 | 5.2506 | 5.2296 | 5.1977 | 0.021 | 0.0319 |
| CD, conservative discectomy; AD, aggressive discectomy; LC1/3, one third laminectomy; LC1/2, half laminectomy; LC2/3, two thirds laminectomy; X1: (CD+LC1/3) minus ( CD+LC1/2); X2: (CD+LC1/2) minus ( CD+LC2/3); X3: ( AD+LC1/3) minus ( AD+LC1/2); X4: ( AD+LC1/2) minus ( AD+LC2/3) | | | | | | | | | | |

| **Table S8 Maximum von-Mises stresses values for articular cartilage of two methods of nucleus pulposus removel in the six models (MPa)** | | | | | | | | | | |
| --- | --- | --- | --- | --- | --- | --- | --- | --- | --- | --- |
|  | | **CD+LC1/3** | **AD+LC1/3** | **X1** | **CD+LC1/2** | **AD+LC1/2** | **X2** | **CD+LC2/3** | **AD+LC2/3** | **X3** |
| Flexion | L | 3.0389 | 3.497 | -0.4581 | 3.0497 | 3.5119 | -0.4622 | 3.1119 | 3.5829 | -0.471 |
| R | 2.3471 | 2.2291 | 0.118 | 2.3309 | 2.2134 | 0.1175 | 2.2909 | 2.1756 | 0.1153 |
| Extension | L | 1.9509 | 2.2363 | -0.2854 | 1.8916 | 2.1768 | -0.2852 | 1.62 | 1.8962 | -0.2762 |
| R | 1.0064 | 0.98967 | 0.01673 | 1.001 | 0.98626 | 0.01474 | 0.99889 | 0.98941 | 0.00948 |
| Left  bending | L | 4.285 | 5.0196 | -0.7346 | 4.3523 | 5.0887 | -0.7364 | 4.6049 | 5.3596 | -0.7547 |
| R | 1.8791 | 2.1243 | -0.2452 | 1.8525 | 2.0819 | -0.2294 | 1.7668 | 1.9807 | -0.2139 |
| Right  bending | L | 2.172 | 2.404 | -0.232 | 2.1054 | 2.3312 | -0.2258 | 1.9461 | 2.1636 | -0.2175 |
| R | 3.1988 | 3.4338 | -0.235 | 3.1983 | 3.4347 | -0.2364 | 3.1948 | 3.4348 | -0.24 |
| Left  rotation | L | 0.003736 | 0.020959 | -0.025854 | 0.004882 | 0.017977 | -0.012095 | 0.004456 | 0.009012 | -0.004556 |
| R | 3.6175 | 3.82 | -0.2025 | 3.6198 | 3.8232 | -0.2034 | 3.6287 | 3.8349 | -0.2062 |
| Right  rotation | L | 4.9544 | 5.4213 | -0.4669 | 5.2457 | 5.7119 | -0.4662 | 6.1599 | 6.6285 | -0.4686 |
| R | 0.002371 | 0.002473 | -0.000102 | 0.002209 | 0.002308 | -0.000099 | 0.003197 | 0.003272 | -0.000075 |
| CD, conservative discectomy; AD, aggressive discectomy; LC1/3, one third laminectomy; LC1/2, half laminectomy; LC2/3, two thirds laminectomy; X1, ( CD+LC1/3) minus ( AD+LC1/3); X2, ( CD+LC1/2) minus ( AD+LC1/2); X3, ( CD+LC2/3) minus ( AD+LC2/3); L, Left; R, Right. | | | | | | | | | | |

| **Table S9 Maximum von-Mises stresses values for articular cartilage of the two methods for the resection area of the LC in the six models (MPa)** | | | | | | | | | | | |
| --- | --- | --- | --- | --- | --- | --- | --- | --- | --- | --- | --- |
|  | | **CD+LC1/3** | **CD+LC1/2** | **CD+LC2/3** | **X1** | **X2** | **AD+LC1/3** | **AD+LC1/2** | **AD+LC2/3** | **X3** | **X4** |
| Flexion | L | 3.0389 | 3.0497 | 3.1119 | -0.0108 | -0.0622 | 3.497 | 3.5119 | 3.5829 | -0.0149 | -0.071 |
| R | 2.3471 | 2.3309 | 2.2909 | 0.0162 | 0.0319 | 2.2291 | 2.2134 | 2.1756 | 0.0157 | 0.0378 |
| Extension | L | 1.9509 | 1.8916 | 1.62 | 0.0593 | 0.2716 | 2.2363 | 2.1768 | 1.8962 | 0.0595 | 0.2806 |
| R | 1.0064 | 1.001 | 0.99889 | 0.0054 | 0.00211 | 0.98967 | 0.98626 | 0.98941 | 0.00341 | -0.00315 |
| Left bending | L | 4.285 | 4.3523 | 4.6049 | -0.0673 | -0.2526 | 5.0196 | 5.0887 | 5.3596 | -0.0691 | -0.2709 |
| R | 1.8791 | 1.8525 | 1.7668 | 0.0266 | 0.0857 | 2.1243 | 2.0819 | 1.9807 | 0.0424 | 0.1012 |
| Right bending | L | 2.172 | 2.1054 | 1.9461 | 0.0646 | 0.1593 | 2.404 | 2.3312 | 2.1636 | 0.0728 | 0.1676 |
| R | 3.1988 | 3.1983 | 3.1948 | 0.0005 | 0.0035 | 3.4338 | 3.4347 | 3.4348 | -0.0009 | -0.0001 |
| Left rotation | L | 0.003736 | 0.004882 | 0.004456 | -0.001146 | 0.000426 | 0.020959 | 0.017977 | 0.009012 | 0.011613 | 0.008965 |
| R | 3.6175 | 3.6198 | 3.6287 | -0.0023 | -0.0089 | 3.82 | 3.8232 | 3.8349 | -0.0032 | -0.0117 |
| Right rotation | L | 4.9544 | 5.2457 | 6.1599 | -0.2913 | -0.9142 | 5.4213 | 5.7119 | 6.6285 | -0.2906 | -0.9166 |
| R | 0.002371 | 0.002209 | 0.003197 | 0.000162 | -0.000988 | 0.002472 | 0.002308 | 0.003272 | 0.000164 | -0.000964 |
| CD, conservative discectomy; AD, aggressive discectomy; LC1/3, one third laminectomy; LC1/2, half laminectomy; LC2/3, two thirds laminectomy; X1, ( CD+LC1/3) minus ( CD+LC1/2); X2, ( CD+LC1/2) minus ( CD+LC2/3); X3, (AD+LC1/3) minus ( AD+LC1/2); X4, (AD+LC1/2) minus ( AD+LC2/3); L, Left; R, Right. | | | | | | | | | | | |
